# Supplementary material for: A novel genome-wide in vivo screen for metastatic suppressors in human colon cancer identifies the positive WNT-TCF pathway modulators TMED3 and SOX12
Source: PubMed Central journal article supplement (PMC4119353; doi:10.15252/emmm.201303799), 2014-06-11
Supplement: emmm0006-0882-SD1.pdf [file emmm0006-0882-SD1.pdf]

**A**

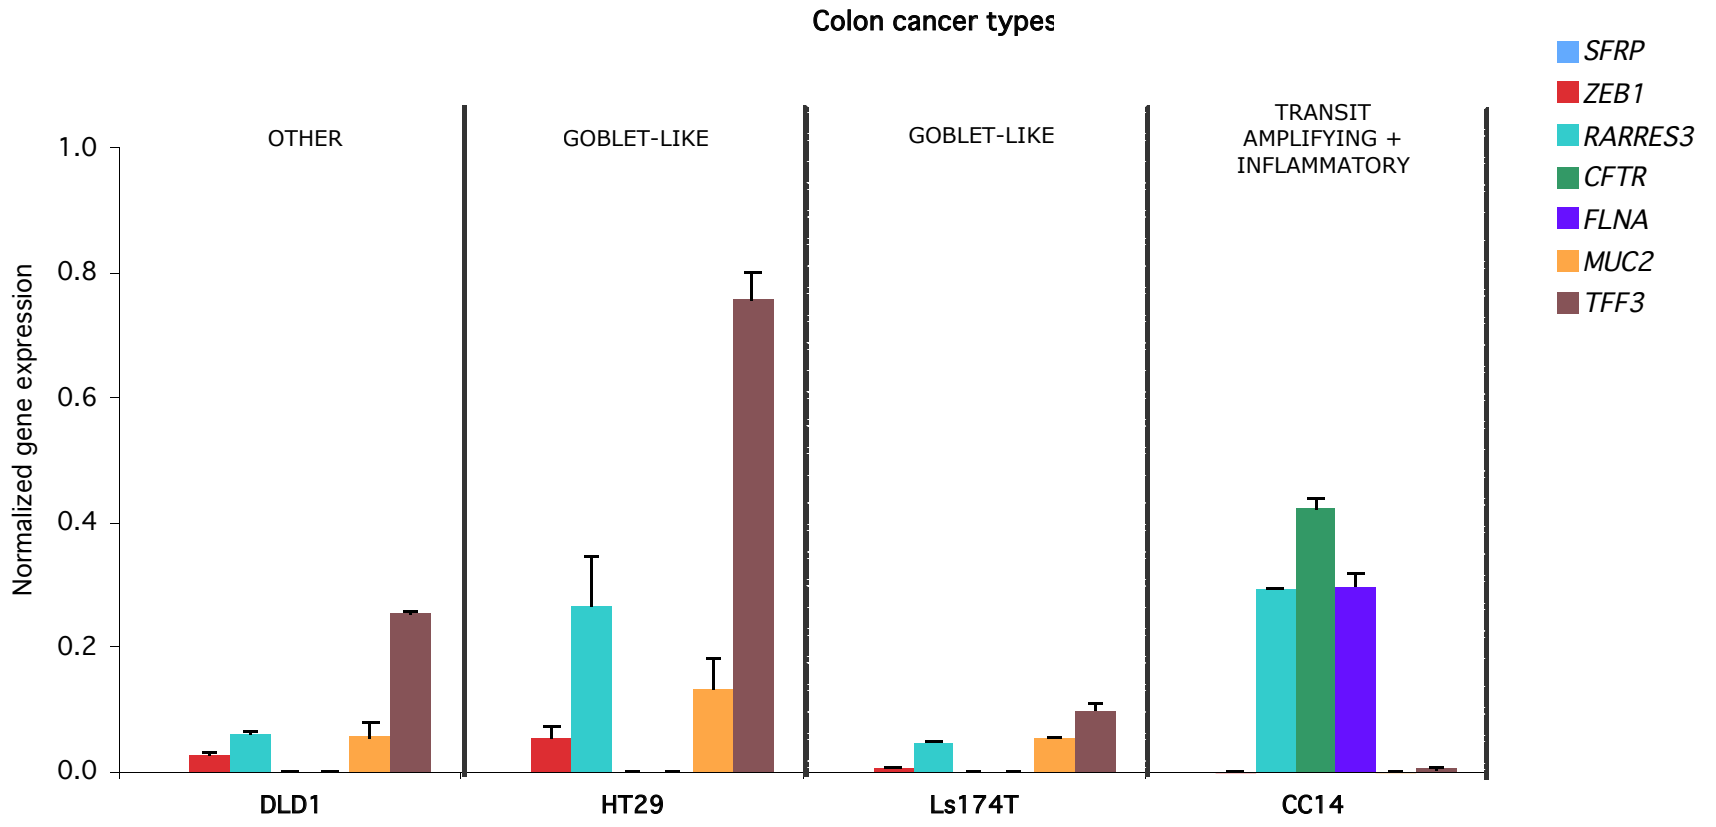

**B**

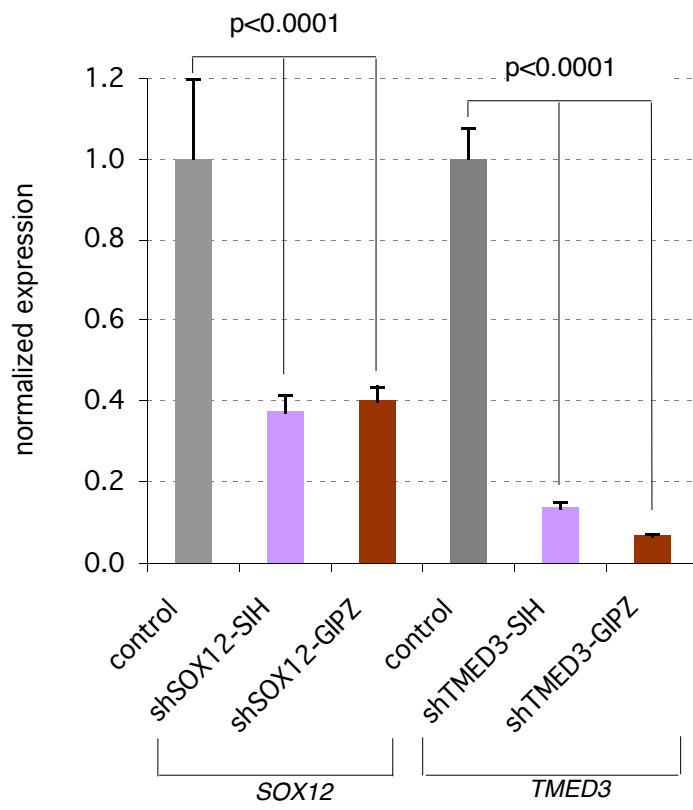

**C**

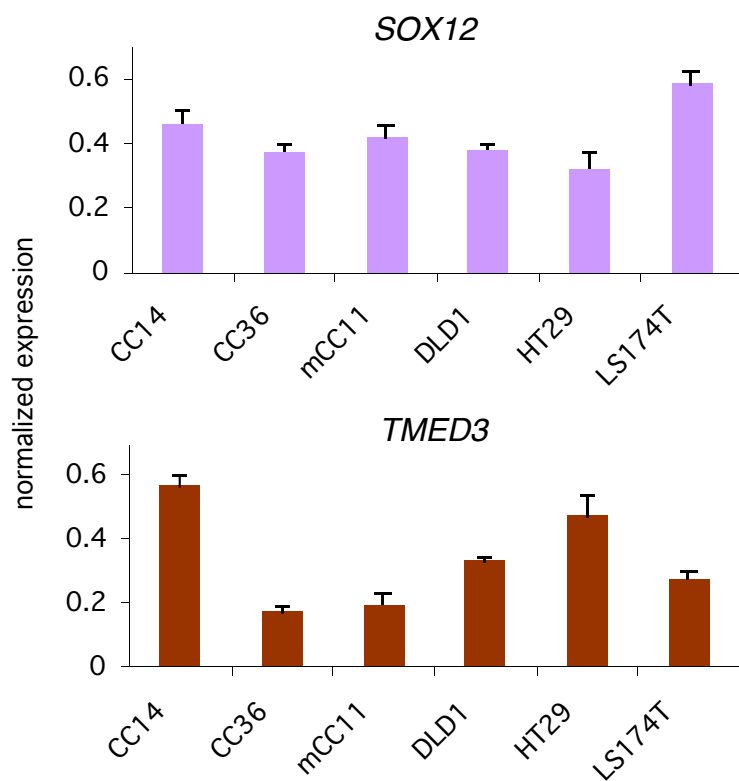

**Supplementary Figure S1. Typing colon cancer cells, ShRNA efficiencies and expression of *TMED3* and *SOX12* in colon cancer cells**

A) Typing of colon cancer cell lines and primary colon cancers by RT-qPCR of the selected genes according to [Sadanandam et al \(2013\)](#), using the reported primers and conditions. The three cell lines yielded a type in agreement with that reported by [Sadanandam et al \(2013\)](#) and served as internal controls.

For easy comparison, normalized ct values by housekeeping genes are shown as fractions where 1 is maximal expression. The top part shows the histogram of the expression values for the genes given in the bottom part.

B) Histograms of RT-qPCR results showing the efficiency of different shRNAs in knocking down their respective targets in the first batch of cells used.

Control refers to empty GIPZ vector (see also [Fig. 8A](#)).

C) Gene expression histograms of RT-qPCR results showing the presence of *TMED3* and *SOX12* mRNAs in various primary colon cancer cells (CC14, CC36, mCC11) and cell lines (DLD1, HT29, Ls174T). In all cases, y axes show ct levels normalized by those of housekeeping genes (see Materials and Methods).
