# Supplementary material for: A novel genome-wide in vivo screen for metastatic suppressors in human colon cancer identifies the positive WNT-TCF pathway modulators TMED3 and SOX12
Source: PubMed Central journal article supplement (PMC4119353; doi:10.15252/emmm.201303799), 2014-06-11
Supplement: emmm0006-0882-SD2.pdf [file emmm0006-0882-SD2.pdf]

A

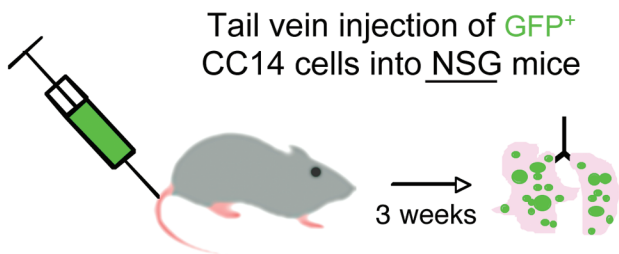

B

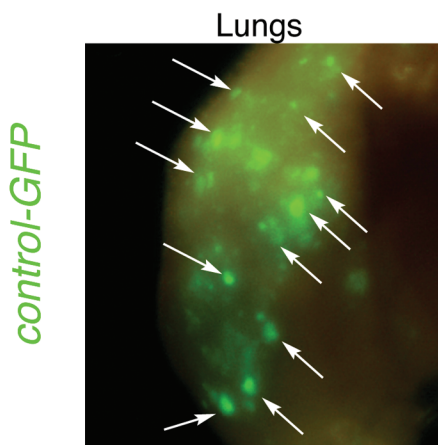

C

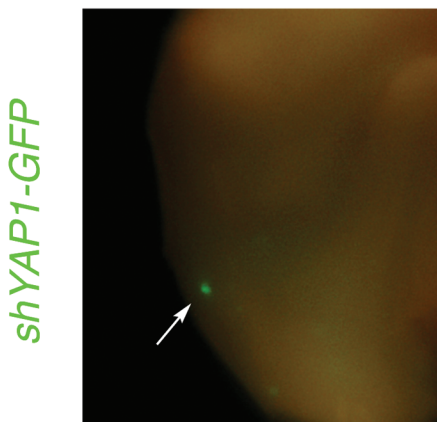

**Supplementary Figure S2. Effect of knockdown of *YAP1* on lung metastatic growth in NSG mice.**

A) Scheme of tail vein injections into NSG mice (see [Fig. 2E](#)).

B) Representative pictures of dissected lung lobes under combined GFP fluorescence illumination and white light. White arrows indicate examples of human colon cancer GFP<sup>+</sup> metastases.
