# Supplementary material for: A novel genome-wide in vivo screen for metastatic suppressors in human colon cancer identifies the positive WNT-TCF pathway modulators TMED3 and SOX12
Source: PubMed Central journal article supplement (PMC4119353; doi:10.15252/emmm.201303799), 2014-06-11
Supplement: emmm0006-0882-SD4.pdf [file emmm0006-0882-SD4.pdf]

**A**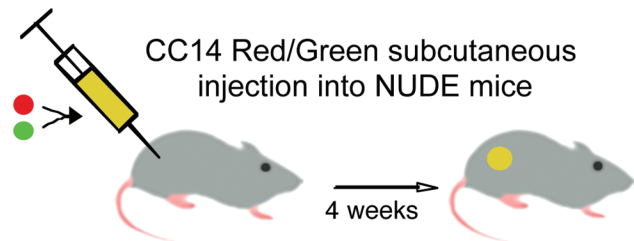**B**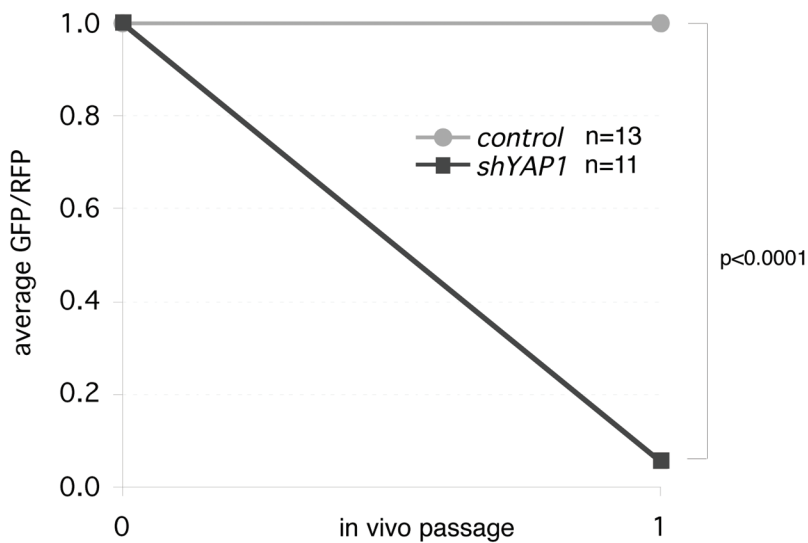

**Supplementary Figure S4. YAP1 is required for efficient competition in vivo.**

A) Scheme of the in vivo red/green competition assay used (see [Fig. 3](#)).

B) Quantification of the GFP<sup>+</sup>/RFP<sup>+</sup> cell ratios, as determined by FACS analyses after cell dissociation, of control RFP<sup>+</sup> cells combined with either control GFP<sup>+</sup> or *shYAP1* GFP<sup>+</sup> cells over one passage in vivo.
