# Supplementary material for: A novel genome-wide in vivo screen for metastatic suppressors in human colon cancer identifies the positive WNT-TCF pathway modulators TMED3 and SOX12
Source: PubMed Central journal article supplement (PMC4119353; doi:10.15252/emmm.201303799), 2014-06-11
Supplement: emmm0006-0882-SD5.pdf [file emmm0006-0882-SD5.pdf]

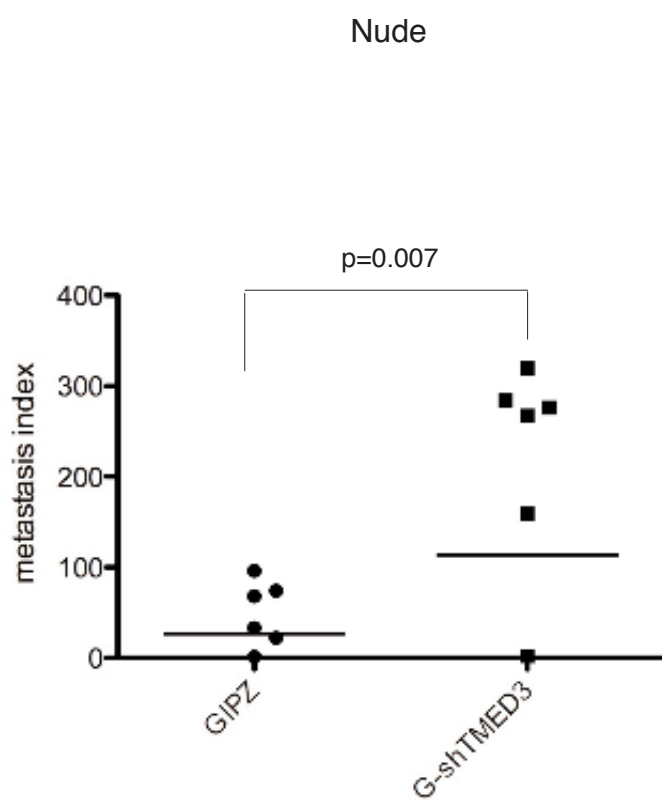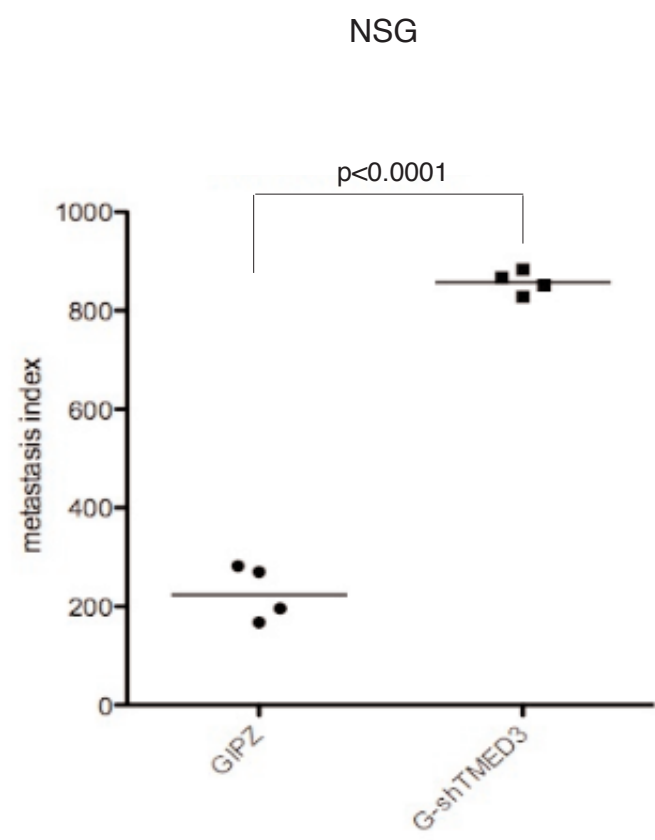

Duquet et al Figure S5

**Supplementary Figure S5. Quantification of metastatic indexes in Nude and NSG mice subcutaneously grafted with control or TMED3-knockdown cells.**

Scatter plots of the number of metastases detected in experiments performed with control GIPZ vector or GIPZ-*shTMED3* either in Nude or in NSG mice. The y axes represent the metastatic index, which is the number of metastases divided by the tumor weight (see [Fig. 4](#)).
