# Supplementary material for: A novel genome-wide in vivo screen for metastatic suppressors in human colon cancer identifies the positive WNT-TCF pathway modulators TMED3 and SOX12
Source: PubMed Central journal article supplement (PMC4119353; doi:10.15252/emmm.201303799), 2014-06-11
Supplement: emmm0006-0882-SD6.pdf [file emmm0006-0882-SD6.pdf]

**A**

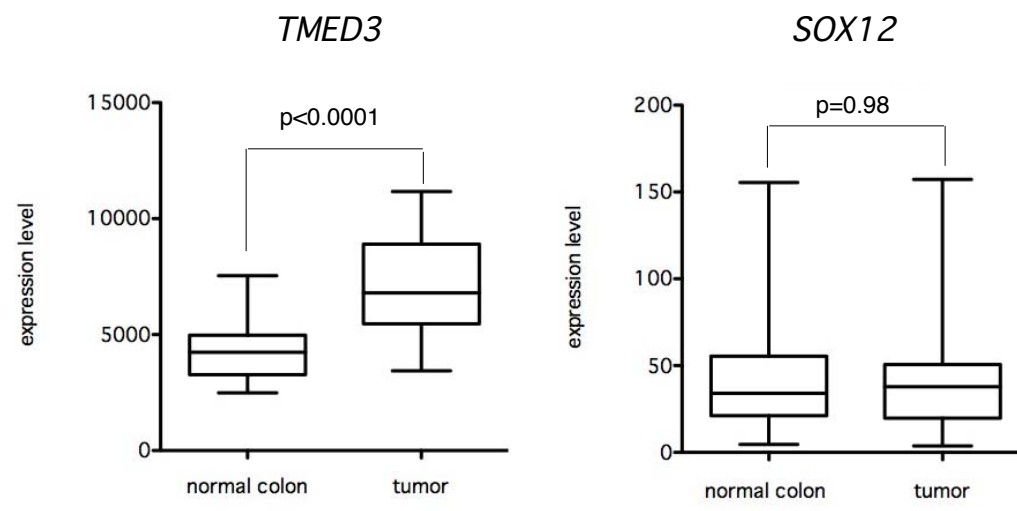

**B**

|            |      | <i>TMED3</i> | <i>SOX12</i> |
|------------|------|--------------|--------------|
| TMN1       | CC76 | 1.7          | 0.8          |
|            | CC72 | 0.8          | 1.4          |
| TMN2       | CC74 | 1.2          | 8.6          |
|            | CC79 | 1.5          | 1.1          |
|            | CC80 | 1.6          | 0.02         |
| TMN3       | CC12 | 0.6          | 1.0          |
|            | CC75 | 1.6          | 0.9          |
|            | CC77 | 3.5          | 0.9          |
|            | CC78 | 6.3          | 0.7          |
| TMN4       | CC10 | 1.7          | 2.2          |
|            | CC70 | 2.3          | 1.1          |
|            | CC73 | 1.1          | 1.0          |
| Liver mets | mCC1 | 2.3          | 1.4          |
|            | mCC2 | 3.9          | 3.1          |

**Supplementary Figure S6. *TMED3*, but not *SOX12*, expression is enhanced in colon cancers versus normal colon.**

A) Box plots showing the expression level of *SOX12* and *TMED3* genes in normal and colon tumors derived from the public dataset GSE10950 (see [Fig. S7](#)).

B) RT-qPCR heat map table of the expression levels of *TMED3* and *SOX12* mRNAs as determined by RT-qPCR. Samples are those described in [Varnat et al. \(2009\)](#) plus new samples from the operating room described in [Fig. S8](#). Results are expressed as fold expression over control (using paired normal colon).
