# Supplementary material for: A novel genome-wide in vivo screen for metastatic suppressors in human colon cancer identifies the positive WNT-TCF pathway modulators TMED3 and SOX12
Source: PubMed Central journal article supplement (PMC4119353; doi:10.15252/emmm.201303799), 2014-06-11
Supplement: emmm0006-0882-SD8.pdf [file emmm0006-0882-SD8.pdf]

|      | Age | Gender | Location           | TNM    | stage |
|------|-----|--------|--------------------|--------|-------|
| CC76 | 75  | male   | right colon        | T2N0M0 | 1     |
| CC72 | 83  | male   | right colon        | T3N0M0 | 2     |
| CC79 | 59  | female | left colon         | T3N0M0 | 2     |
| CC80 | 63  | male   | left colon         | T3N0M0 | 2     |
| CC12 | 82  | male   | rectum             | T3N1M0 | 3     |
| CC75 | 72  | female | right colon        | T4N2M0 | 3     |
| CC77 | 88  | female | rectum             | T3N1M0 | 3     |
| CC78 | 71  | male   | left colon         | T3N2M0 | 3     |
| CC10 | 74  | female | rectum             | T3N2M1 | 4     |
| CC70 | 49  | female | left colon         | T4N2M1 | 4     |
| CC73 | 54  | male   | na                 | T4N2M1 | 4     |
| CC60 | 66  | male   | sigmoid/left colon | T3N2M1 | 4     |
| mCC1 | 66  | female | liver met          | T0N1M1 | 4     |
| mCC2 | 64  | male   | liver met          | T3N2M1 | 4     |

Duquet et al Figure S8

**Supplementary Figure S8. Human tumor data.**

Medical data of primary colon tumor samples used in this study not described in [Varnat et al. \(2009; 2010\)](#).

na = data not available.
