# Supplementary material for: A novel genome-wide in vivo screen for metastatic suppressors in human colon cancer identifies the positive WNT-TCF pathway modulators TMED3 and SOX12
Source: PubMed Central journal article supplement (PMC4119353; doi:10.15252/emmm.201303799), 2014-06-11
Supplement: emmm0006-0882-SD10.pdf [file emmm0006-0882-SD10.pdf]

|                 | <b>FORWARD</b>          | <b>REVERSE</b>           |
|-----------------|-------------------------|--------------------------|
|                 | 5'→3'                   | 5'→3'                    |
| <i>TBP</i>      | TGCACAGGAGCCAAGAGTGAA   | CACATCACAGCTCCCCACCA     |
| <i>HMBS</i>     | AAGTGCAGCAAGGACCAG      | TTACGAGCAGTGATGCCTACCAAC |
| <i>β-ACTIN</i>  | TGGAGAAAATCTGGCACCACACC | GATGGGCACAGTGTGGGTGACCC  |
| <i>GLI1</i>     | GGCACCATCCATTTCTACA     | CCTGCATTGCCAGTCATTT      |
| <i>GLI2</i>     | AGCAGCAGCAACTGTCTGAG    | CACATGAGCCGTGTCCAG       |
| <i>PTCH1</i>    | CCACAGAAGCGCTCCTACA     | CTGTAATTTGCCCCCTTCC      |
| <i>ASCL2</i>    | GCGTTCCGCCTACTCGT       | GGCTTCCGGGGCTGAG         |
| <i>LGR5</i>     | GGAGCATTCACTGGCCTTTA    | CTGGACGGGGATTTCTGTTA     |
| <i>OLFM4</i>    | GGACTTCGAGCTGATCAAGG    | CGACAGGGGTGTTTTGATCT     |
| <i>AXIN2</i>    | CTCCTTATCGTGTGGGCAGT    | CCAACTCCAGCTTCAGCTTT     |
| <i>EPHB2</i>    | GCCTGTGTGCACTTATGCAG    | CTTGGTCCGTAGCCAGTTTGT    |
| <i>P21</i>      | GACTCTCAGGGTCGAAAACG    | AAGATGTAGAGCGGGCCTTT     |
| <i>β-CAT</i>    | ATGATGCAGAACTTGCCACA    | CATCTGAGGAGAACGCATGA     |
| <i>NANOG/P8</i> | GGATGGTCTCGATCTCCTGA    | CGGCAGCCAAGGTTATTA       |
| <i>E-CAD</i>    | GGATGTGCTGGATGTGAATG    | CTCAAATCCTCCCTGTCCA      |
| <i>SNAIL1</i>   | GAAAGGCCTTCAACTGCAA     | TGACATCTGAGTGGGTCTGG     |
| <i>SOX12</i>    | GCCTCCCCGACACCGTCGGA    | ATCCAGGGCGCTGCAGTCCA     |
| <i>TMED3</i>    | CCTCCCATTCTCCAGACT      | CAATCGTCTGCCAACAGAC      |
| <i>C-MYC</i>    | TGGTCTTCCCCTACCCTCT     | GATCCAGACTCTGACCTTTT     |
| <i>CD44</i>     | AAGGTGGAGCAAACACAACC    | AGCTTTTTCTTCTGCCACA      |
| <i>YAP1</i>     | GCAGTTGGGAGCTGTTTCTC    | GCCATGTTGTTGTCTGATCG     |

Duquet et al Figure S10

**Supplementary Figure S10. PCR primer sequences.**

Table of primers used for qPCR as described in the text.
